# Supplementary material for: Lipid Profile, Lipoprotein Subfractions, and Fluidity of Membranes in Children and Adolescents with Depressive Disorder: Effect of Omega-3 Fatty Acids in A Double-blind Randomized Controlled Study
Source: Preprints.org preprint supplement (doi:10.20944/preprints202008.0431.v1), 2020-08-20
Supplement: Supplementary file 1 [file Supplement S1.doc]

**
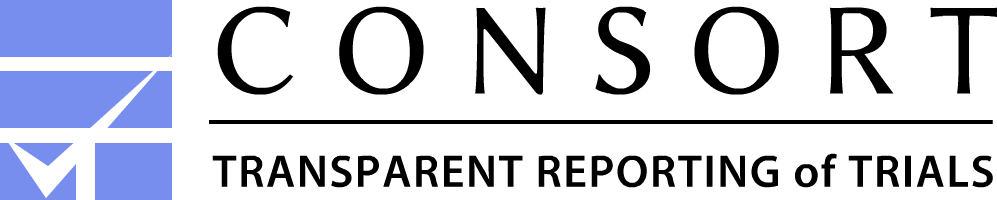
**

**CONSORT 2010 Flow Diagram**

**Enrollment**

**Allocation**

**Investigation**

**Follow-Up**

Excluded (n=36)

  Not meeting inclusion criteria (n=11)

  Declined to participate (n=10)

  Travelling problems (n=6)

Intolerance to blood taking (n=9)

Analysed supplemented (n=29)
 Excluded from analysis (n=0)

- Treated with antidepressants during intervention (n=24)
- No treatment during intervention (n=5)

Randomized (n=60)

Analysed supplemented (n=29)
 Excluded from analysis (n=0)

- Treated with antidepressants during intervention (n=22)
- No treatment during intervention (n=7) ???

**Omega 6** (n= 30)

 Received allocated intervention (n=30)

 Did not receive intervention whole period (n=1)

Non-compliance (n=1)

- Subgroup with DD (n=13, 44.8%)
- Subgroup with MADD (n=16, 55.2%)
- Treated for at least one month before enrollment (n=10, 34.5%)
- Firstly diagnosed (n=19, 65,5%)

**Discontinued participation after week 12** (n=5)

- Non-compliance (n=1)
- Problem with travelling (n=2)
- Intolerance to blood taking (n=2)

**Omega 3** (n= 30)

 Received allocated intervention (n= 30)

 Did not receive intervention whole period (n=1)

Taste of supplement (n=1)

- Subgroup with DD (n=17, 58.6%)
- Subgroup with MADD (n=12, 41.4%)
- Treated for at least one month before enrollment (n=14. 48.3%)
- Firstly diagnosed (n=15, 51.7%)

**Discontinued participation after week 12** (n=1)

- Non-compliance (n=1)

Assessed for eligibility (n=96)
