# Supplementary material for: Lipid Profile, Lipoprotein Subfractions, and Fluidity of Membranes in Children and Adolescents with Depressive Disorder: Effect of Omega-3 Fatty Acids in A Double-blind Randomized Controlled Study
Source: Preprints.org preprint supplement (doi:10.20944/preprints202008.0431.v1), 2020-08-20
Supplement: Supplementary file 2 [file Supplement S2.docx]

**Supplement S2. Biochemical martkers in controls and patients at the baseline and durin the intervention at the week 6 and 12**

Glu - fasting glucose, CreV - creatinive, UA - uric acid, TCH - total cholesterol, HDL - HDL-cholesterol, LDL - LDL-cholesterol, TAG - triacylglycerols, AI - atherogenic index (LDL/HDL), AST - Aspartate Aminotransferase, ALT - Alanine Aminotransferase, GMT - Gamma-glutamyltransferase, Crea_U - creatinine in urine, hsCRP - hight sensitive C-rective protein, C -control, P - patients, n - number os subjects, SD - standard deviation, Om3 - Omega-3 group, Om6 - Omega-6 group, vs - versus
