# Supplementary material for: Lipid Profile, Lipoprotein Subfractions, and Fluidity of Membranes in Children and Adolescents with Depressive Disorder: Effect of Omega-3 Fatty Acids in A Double-blind Randomized Controlled Study
Source: Preprints.org preprint supplement (doi:10.20944/preprints202008.0431.v1), 2020-08-20
Supplement: Supplementary file 3 [file Supplement S3.docx]

**Supplement S3. LDL subfractions in serum of controls and patients at the baseline and durin the intervention at the week 6 and 12**

VLDL - very low density lipoproteins, IDL - intermediate density lipoproteins, LDL - low density lipoproteins, C - controls, P - patients, Om3 - omega-3 group, Om6 - omega-6 group, n - number of subjects, SD - standard deviation, p - significance
