# Supplementary material for: Lipid Profile, Lipoprotein Subfractions, and Fluidity of Membranes in Children and Adolescents with Depressive Disorder: Effect of Omega-3 Fatty Acids in A Double-blind Randomized Controlled Study
Source: Preprints.org preprint supplement (doi:10.20944/preprints202008.0431.v1), 2020-08-20
Supplement: Supplementary file 4 [file Supplement S4.docx]

**Supplement S4. HDL subfractions in serum of controls and patients at the baseline and durin the intervention at the week 6 and 12**

HDL - density lipoproteins, L-HDL - large HDL lipoprteins, I-HDL - intermediate HDL lipoproteins, S-HDL - small HDL lipoproteins, Cho - cholesterol, C - controls, P - patients, Om3 - omega-3 group, Om6 - omega-6 group, n - number of subjects, SD - standard deviation, p - significance
