# Supplementary material for: Lipid Profile, Lipoprotein Subfractions, and Fluidity of Membranes in Children and Adolescents with Depressive Disorder: Effect of Omega-3 Fatty Acids in A Double-blind Randomized Controlled Study
Source: Preprints.org preprint supplement (doi:10.20944/preprints202008.0431.v1), 2020-08-20
Supplement: Supplementary file 5 [file Supplement S5.docx]

**Supplement S5. Activities of PON-L and PON-A in controls and in patients at the baseline and during the intervention at the week 6**

**and week 12**

|  | Controls | | | All | | Om3 | | | | | | Om6 | | | | | |
| --- | --- | --- | --- | --- | --- | --- | --- | --- | --- | --- | --- | --- | --- | --- | --- | --- | --- |
| PON |  | ±SD | p C vs P | Week 0 | ±SD | Week 6 | ±SD | p 0 vs 6 | Week 12 | ±SD | p 0 vs 12 | Week 6 | ±SD | p 0 vs 6 | Week 12 | ±SD | p 0 vs 12 |
| (U/mL) | n=20 |  |  | n=59 |  | n=29 |  |  | n=26 |  |  | n=28 |  |  | n=26 |  |  |
| PON-L | 10.6 | 2.6 | 0.520 | 10.2 | 2.6 | 10.9 | 3.5 | 0.084 | 9.6 | 2.2 | 0.146 | 10.7 | 3.8 | 0.997 | 11.1 | 3.7 | 0.919 |
| PON-A | 122.7 | 23.0 | 0.142 | 117.2 | 26.1 | 115.7 | 30.2 | 0.249 | 118.5 | 29.3 | 0.519 | 115.4 | 20.6 | 0.805 | 119.9 | 20.4 | 0.352 |
|  |  |  |  |  |  |  |  |  |  |  |  |  |  |  |  |  |  |

PON - paraoxonase 1, PON-L - lactonase activity of PON 1, PON-A - arylesterase activity of PON 1, Om3 - omega-3 group, Om6 - omega-6 group, SD - standard deviation, V - controls, P - patients, p - significance, n - number of subjects
